# Supplementary material for: Naproxen release behaviour from graphene oxide/cellulose acetate composite nanofibers
Source: Royal Society of Chemistry journal article supplement (doi:10.1039/d1ra09293f), 2022-01-01
Supplement: d1ra09293f1.pdf [file d1ra09293f1.pdf]

## Supporting Information

### Naproxen release behaviour from graphene oxide/cellulose acetate composite nanofiber

**Wulan Purnamasari,<sup>a±</sup> Titah Aldila Budiastanti,<sup>b±</sup> Aminatun Aminatun,<sup>a</sup> Ulfa Rahmah,<sup>b</sup> Sri Sumarsih,<sup>b</sup> Jia-yaw Chang,<sup>c</sup> Mochamad Zakki Fahmi,<sup>bd\*</sup>**

<sup>a</sup> Department of Physic, Faculty of Science and Technology, Universitas Airlangga, Surabaya 60115, Indonesia.

<sup>b</sup> Department of Chemistry, Faculty of Science and Technology, Universitas Airlangga, Surabaya 60115, Indonesia.

<sup>c</sup> Department of Chemical Engineering, National Taiwan University of Science and Technology, Taipei 106, Taiwan

<sup>d</sup> Supra Modification Nano-micro-Engineering Laboratory, Universitas Airlangga, Surabaya 60115, Indonesia.

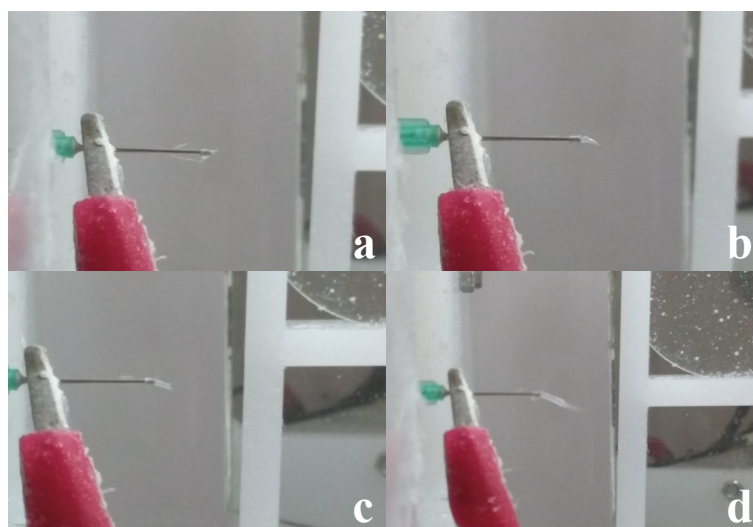

Figure S1. The images on spinneret area during the electrospinning process of CA-GO nanofiber using flow rate of 0.01(a), 0.01 (b), 0.05 (c), 0,1 (d) and 0.5  $\mu\text{l/h}$  (d)

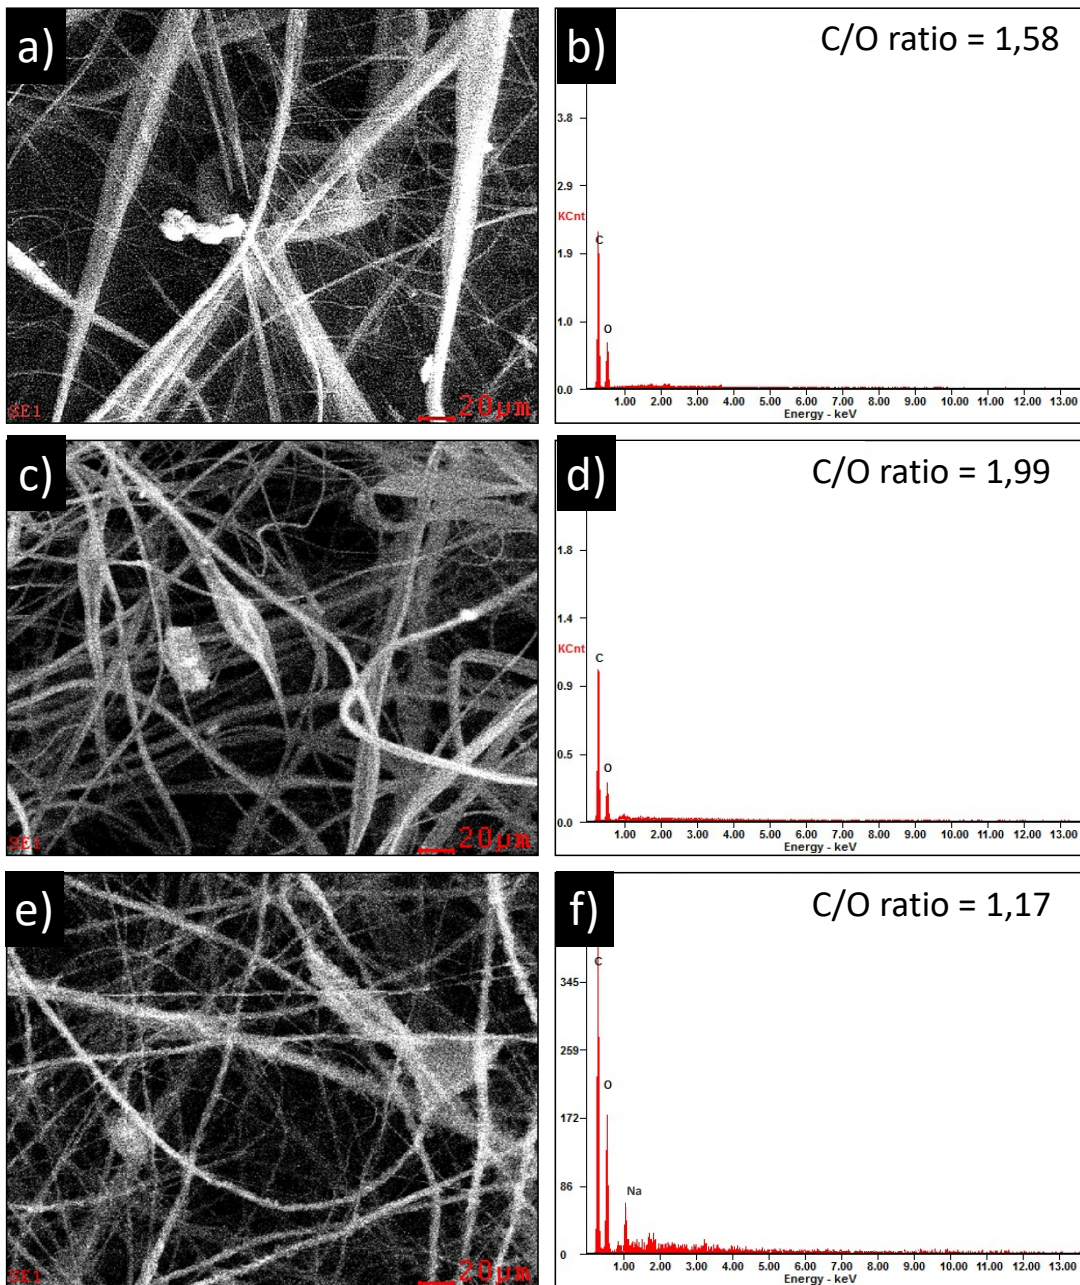

Figure S2. Adjusted area and its EDX data for CA (a-b), CA-GO (c-d), CA-GO-NA (e-f).

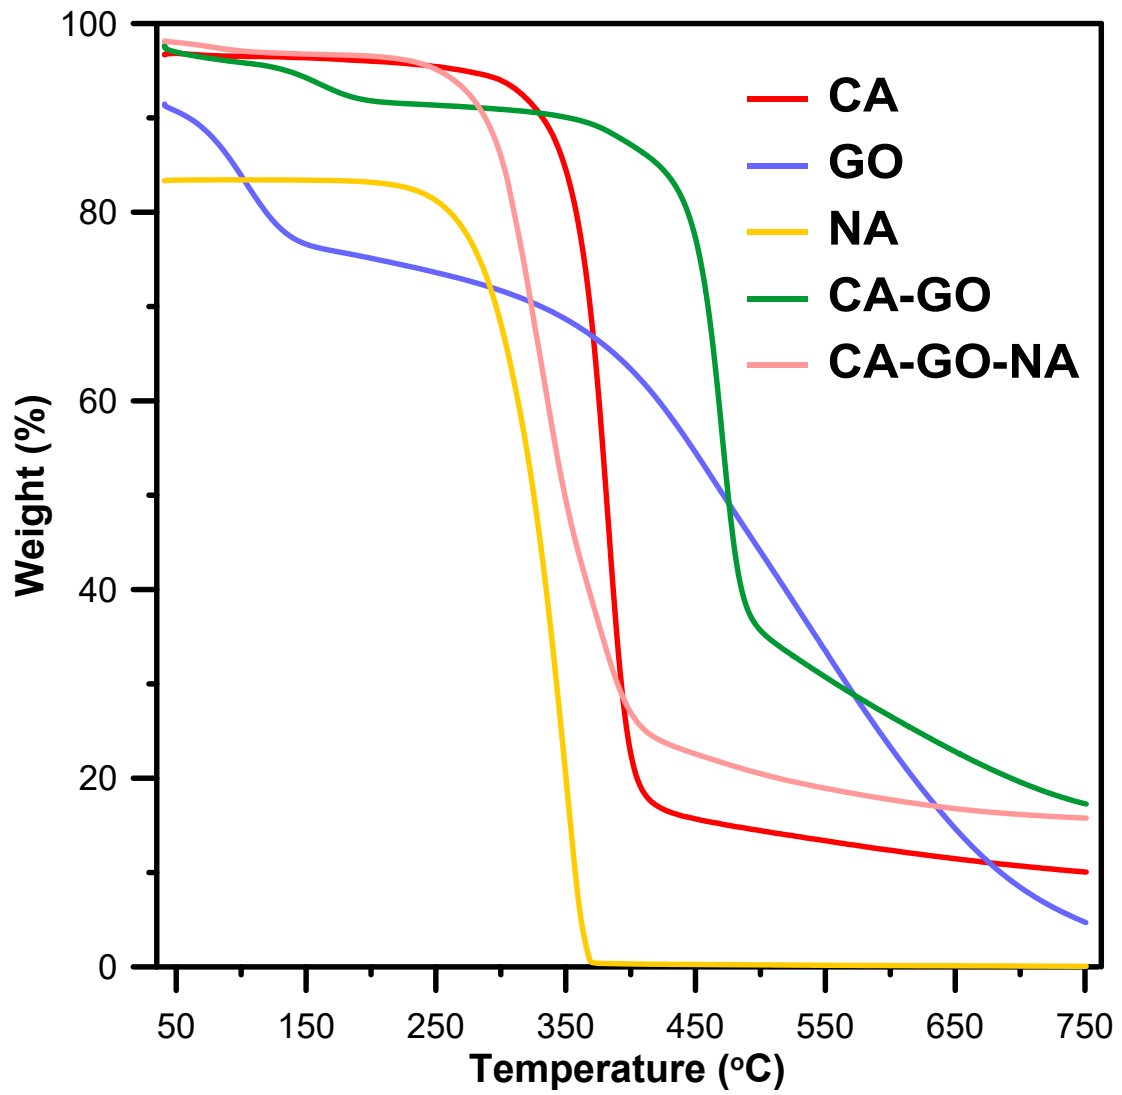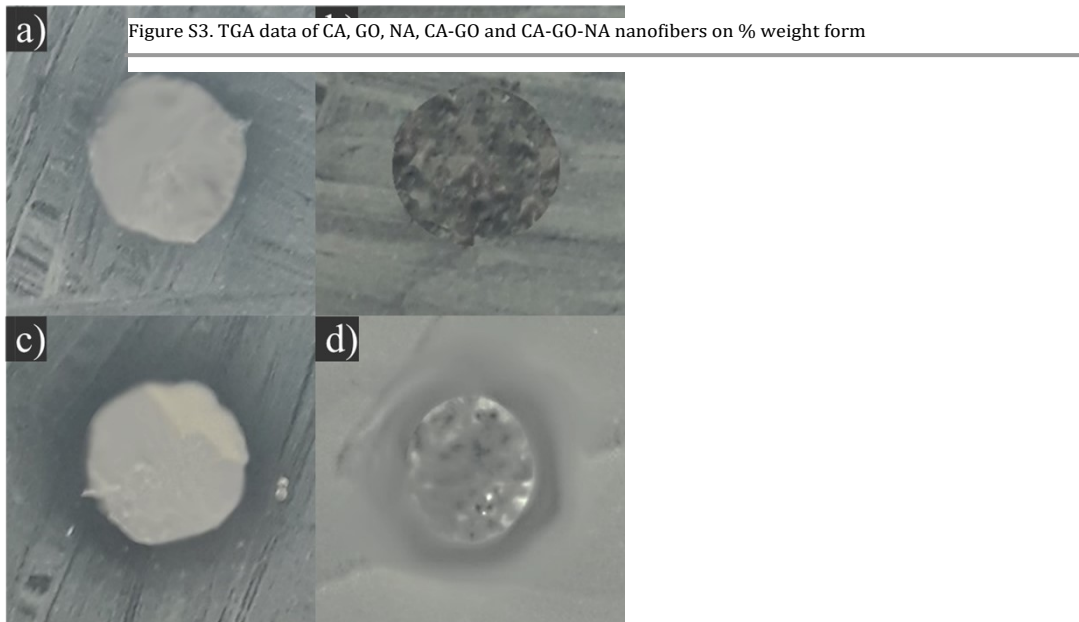

Figure S4. Inhibition area of *Staphy. Aureus* on (a) CA; (b) CA-GO; (c) CA-NA; (d) CA-GO-NA

**Table S1.** Conductivity data of GO varied composite nanofiber

| Nanofiber Sample         | Conductivity ( $\mu\text{S}\cdot\text{cm}^{-1}$ ) |
|--------------------------|---------------------------------------------------|
| CA-GO <sub>0.1</sub>     | 1.0                                               |
| CA-GO <sub>0.5</sub>     | 1.0                                               |
| CA-GO <sub>1</sub>       | 1.2                                               |
| CA-GO <sub>0.1</sub> -NA | 1.1                                               |
| CA-GO <sub>0.5</sub> -NA | 1.5                                               |
| CA-GO <sub>1</sub> -NA   | 1.6                                               |
